# Supplementary material
Source: HighWire-hosted journal article supplement (https://dmd.aspetjournals.org/highwire/filestream/76498/field_highwire_adjunct_files/0/215_Supp_figs.pdf)
Supplement: 215_Supp_figs.pdf [file 215_Supp_figs.pdf]

**The Hypoglycemic Effect of Berberine and Berberrubine Involves Modulation of  
Intestinal FXR Signaling Pathway and Inhibition of Hepatic Gluconeogenesis**

Runbin Sun<sup>1</sup>, Bo Kong<sup>2</sup>, Na Yang<sup>4</sup>, Bei Cao<sup>4</sup>, Dong Feng<sup>1</sup>, Xiaoyi Yu<sup>1</sup>, Chun Ge<sup>1</sup>, Siqi Feng<sup>1</sup>,  
Fei Fei<sup>4</sup>, Jingqiu Huang<sup>1</sup>, Zhenyao Lu<sup>1</sup>, Yuan Xie<sup>1</sup>, Chung S. Yang<sup>3</sup>, Grace L. Guo<sup>2</sup>, Guangji  
Wang<sup>1,\*</sup> and Jiye Aa<sup>1,\*</sup>

<sup>1</sup>Jiangsu Province Key Laboratory of Drug Metabolism and Pharmacokinetics, State Key  
Laboratory of Natural Medicines, China Pharmaceutical University, Nanjing, China, 210009

<sup>2</sup>Department of Pharmacology and Toxicology, Ernest Mario School of Pharmacy, Rutgers,  
The State University of New Jersey, Piscataway, New Jersey, United States of America,  
08854

<sup>3</sup>Department of Chemical Biology, Ernest Mario School of Pharmacy, Rutgers, The State  
University of New Jersey, Piscataway, New Jersey, United States of America, 08854

<sup>4</sup>Nanjing Drum Tower Hospital, the Affiliated Hospital of Nanjing University Medical School,  
Nanjing, China, 210008

## Animal treatment

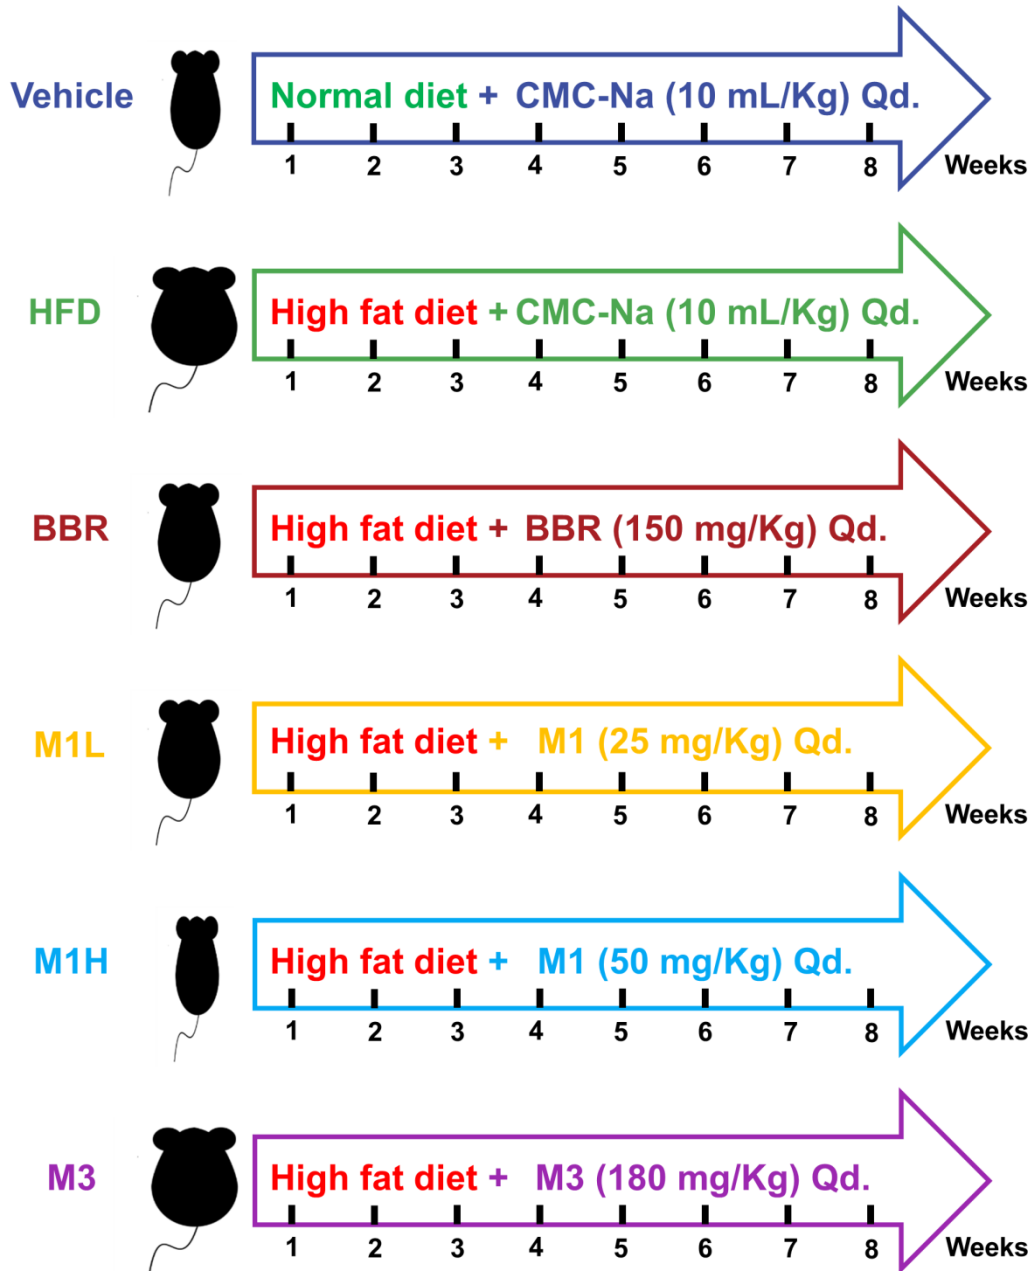

**Figure S1. An overview of the schedule of animal experiments.**

C57BL/6J mice were treated with BBR (150 mg/kg, i.g.), M1 (M1-25 group, gavaged with 25 mg/Kg of M1), M1 (M1-50 group, gavaged with 50 mg/Kg of M1) and M3 (M3-180 group, gavaged with 180 mg/Kg of M3) for 8 weeks.

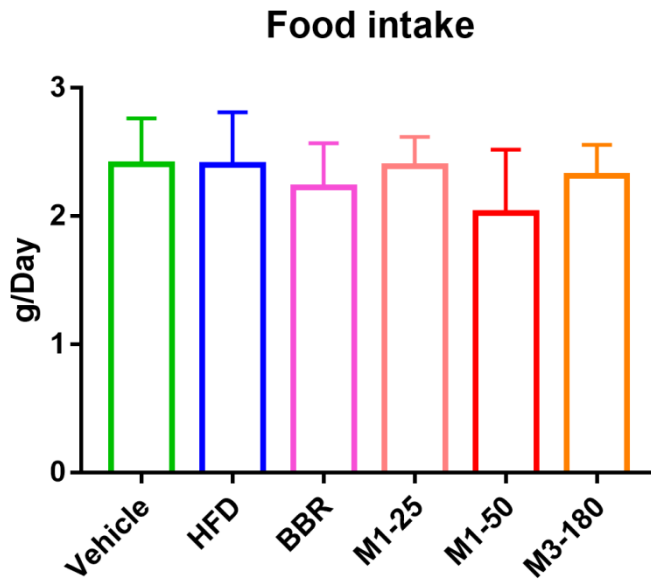

**Figure S2.** The food intake of each group.

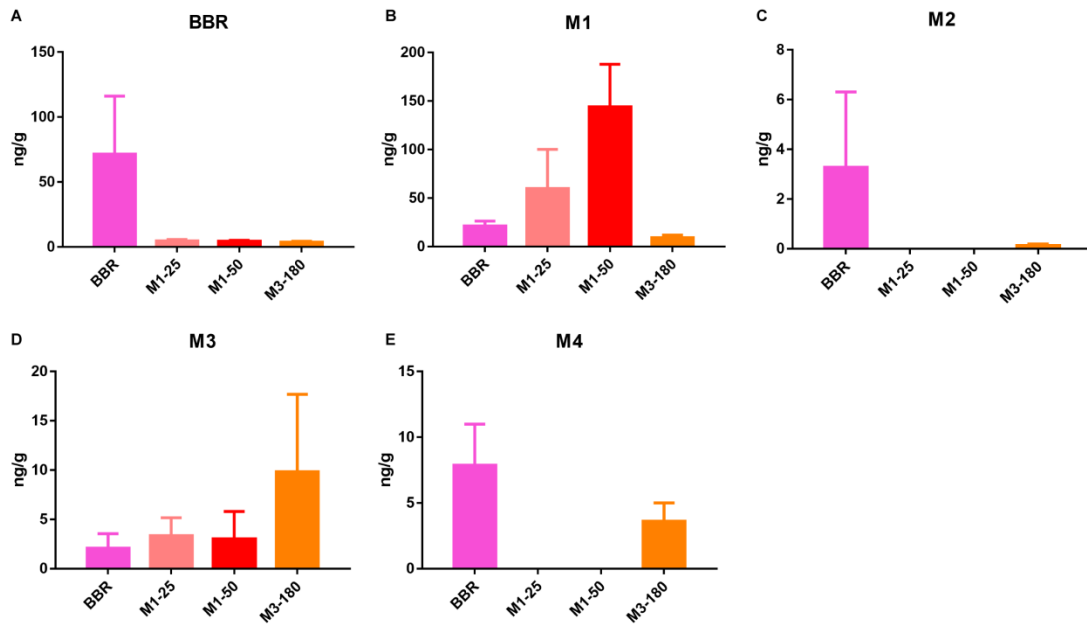

**Figure S3.** The concentrations of BBR and its metabolites in the liver of mice treated with BBR, M1 and M3.
